# Supplementary material for: Streptococcus pneumoniae Clonal Complex 199: Genetic Diversity and Tissue-Specific Virulence
Source: PLoS One. 2011 Apr 14;6(4):e18649. doi: 10.1371/journal.pone.0018649 (PMC3077395; doi:10.1371/journal.pone.0018649)
Supplement: Table S1 — Genes found to be variably present within CC199. (XLS) [file pone.0018649.s001.xls]

## Sheet: Sheet1
Name	Product
SP_0069	Choline Binding Protein I
SP_0074	Acetyltransferase, Cyse/Laca/Lpxa/Nodl Family
SP_0109	Putative Bacteriocin
SP_0117	Pneumococcal Surface Protein A
SP_0163	Putative Transcriptional Regulator Plcr
SP_0164	Hypothetical Protein
SP_0165	Flavoprotein
SP_0166	Pyridoxal-Dependent Decarboxylase, Orn/Lys/Arg Family
SP_0167	Hypothetical Protein
SP_0169	Lactose Phosphotransferase System Repressor, Degenerate
SP_0170	Hypothetical Protein
SP_0171	Rok Family Protein
SP_0244	Hypothetical Protein
SP_0296	Hypothetical Protein
SP_0307	Pts System, Iia Component
SP_0348	Capsular Polysaccharide Biosynthesis Protein Cps4C
SP_0351	Capsular Polysaccharide Biosynthesis Protein Cps4F
SP_0352	Capsular Polysaccharide Biosynthesis Protein Cps4G
SP_0354	Putative Membrane Protein
SP_0357	Udp-N-Acetylglucosamine-2-Epimerase
SP_0359	Capsular Polysaccharide Biosynthesis Protein Cps4K
SP_0377	Choline Binding Protein C
SP_0378	Choline Binding Protein J
SP_0395	Putative Transcriptional Regulator
SP_0396	Pts System, Mannitol-Specific Iia Component
SP_0399	Glutamine Abc Transporter, Atp-Binding Protein, Truncation
SP_0460	Is1167, Transposase
SP_0462	Cell Wall Surface Anchor Family Protein
SP_0463	Cell Wall Surface Anchor Family Protein
SP_0465	Hypothetical Protein
SP_0468	Putative Sortase
SP_0531	Bacteriocin Blpi
SP_0532	Bacteriocin Blpj
SP_0569	Type Ii Dna Modification Methyltransferase, Truncation
SP_0570	Conserved Domain Protein
SP_0607	Amino Acid Abc Transporter, Permease Protein
SP_0891	Putative Type I Restriction-Modification System, S Subunit
SP_0907	Putative Capsular Polysaccharide Biosynthesis Protein
SP_0953	Acetyltransferase, Gnat Family
SP_1055	Tn5252, Orf 9 Protein
SP_1059	Hypothetical Protein
SP_1060	Hypothetical Protein
SP_1134	Hypothetical Protein
SP_1136	Conserved Domain Protein
SP_1137	Putative Gtp-Binding Protein
SP_1138	Hypothetical Protein
SP_1141	Hypothetical Protein
SP_1142	Hypothetical Protein
SP_1145	Hypothetical Protein
SP_1146	Hypothetical Protein
SP_1234	Transcriptional Regulator, Biotin Repressor Family
SP_1292	Sap Domain Protein
SP_1315	V-Type Sodium Atp Synthase, Subunit D
SP_1316	V-Type Sodium Atp Synthase, Subunit B
SP_1317	V-Type Sodium Atp Synthase, Subunit A
SP_1318	V-Type Sodium Atp Synthase, Subunit G
SP_1319	V-Type Sodium Atp Synthase, Subunit C
SP_1320	V-Type Sodium Atp Synthase, Subunit E
SP_1321	V-Type Sodium Atp Synthase, Subunit K
SP_1322	V-Type Sodium Atp Synthase, Subunit I
SP_1323	Hypothetical Protein
SP_1324	Putative Regulatory Protein
SP_1325	Oxidoreductase, Gfo/Idh/Moca Family
SP_1326	Putative Neuraminidase
SP_1327	Conserved Hypothetical Protein
SP_1328	Sodium:Solute Symporter Family Protein
SP_1329	N-Acetylneuraminate Lyase
SP_1330	Putative N-Acetylmannosamine-6-P Epimerase
SP_1331	Putative Phosphosugar-Binding Transcriptional Regulator
SP_1332	Conserved Domain Protein
SP_1334	Conserved Hypothetical Protein
SP_1335	Hypothetical Protein
SP_1336	Type Ii Dna Modification Methyltransferase Spn5252Ip
SP_1340	Hypothetical Protein
SP_1341	Abc Transporter, Atp-Binding Protein
SP_1345	Hypothetical Protein
SP_1347	Hypothetical Protein
SP_1349	Hypothetical Protein
SP_1438	Abc Transporter, Atp-Binding Protein
SP_1503	Is1380-Spn1, Transposase
SP_1612	Conserved Domain Protein
SP_1616	Ribulose-Phosphate 3-Epimerase Family Protein
SP_1620	Putative Pts System, Nitrogen Regulatory Component Iia
SP_1622	Transposase, Is200 Family
SP_1793	Hypothetical Protein
SP_1947	Hypothetical Protein
SP_1948	Conserved Domain Protein
SP_1949	Hypothetical Protein
SP_1951	Conserved Hypothetical Protein
SP_1952	Hypothetical Protein
SP_1953	Toxin Secretion Abc Transporter, Permease/Atp-Binding Protein
SP_1954	Serine Protease, Subtilase Family
SP_1955	Hypothetical Protein
SP_2003	Abc Transporter, Atp-Binding Protein
SPN01143	Hypothetical Protein Homologous To Spt01524
SPN01159	Hypothetical Protein Homologous To Spt01510
SPN01240	Hypothetical Protein Homologous To Spt01437
SPN01249	Transposase.
SPN03059	Hypothetical Protein Homologous To Spt02471
SPN03060	285Aa Long Hypothetical Integrase/Recombinase.
SPN03106	Xylose Repressor.
SPN03110	Pts System, Lactose-Specific Iia Component (Eiia-Lac) (Lactose- Permease Iia Component) (Phosphotransferase Enzyme Ii, A Component) (Ec 2.7.1.69) (Eiii-Lac).
SPN03138	Hypothetical Protein Homologous To Spt03334
SPN03139	Transposase.
SPN05002	Hypothetical Protein.
SPN05004	Hypothetical Protein.
SPN05080	Hypothetical Protein Homologous To Spt02993
SPN05081	Hypothetical Protein.
SPN06003	Pts System, Mannitol-Specific Iibc Component (Eiibc-Mtl) (Mannitol- Permease Iibc Component) (Phosphotransferase Enzyme Ii, Bc Component) (Ec 2.7.1.69) (Eii-Mtl).
SPN08233	24.9 Kda Protein (Cpsd).
SPN14033	Pcpc.
SPN14034	Pcpc.
SPN22001	Hypothetical Protein Homologous To Spt01457
SPN22004	Probable Amino-Acid Abc Transporter Extracellular Binding Protein Yqix Precursor.
SPN22005	Argininosuccinate Synthase (Ec 6.3.4.5) (Citrulline--Aspartate Ligase).
spr0115	Hypothetical Protein
spr0280	Phosphotransferase System Sugar-Specific Eii Component
spr0282	Phosphotransferase System Sugar-Specific Eii Component
spr0350	Choline Binding Protein G
spr0361	Conserved Hypothetical Protein
spr0533	Abc Transporter Membrane-Spanning Permease - Glutamine Transport
spr0700	Hypothetical Protein
spr0923	Spermine/Spermidine Acetyltransferase
spr1200	Hypothetical Protein
spr1203	Abc Transporter Atp-Binding/Membrane Spanning Protein - Multidrug Resistance
spr1204	Protease Ii (Oligopeptidase B)
spr1206	Hypothetical Protein
